# Supplementary material
Source: publisher figshare collection journal article supplement (https://frontiersin.figshare.com/ndownloader/files/14055635)
Supplement: Supplementary file [file 14055635]

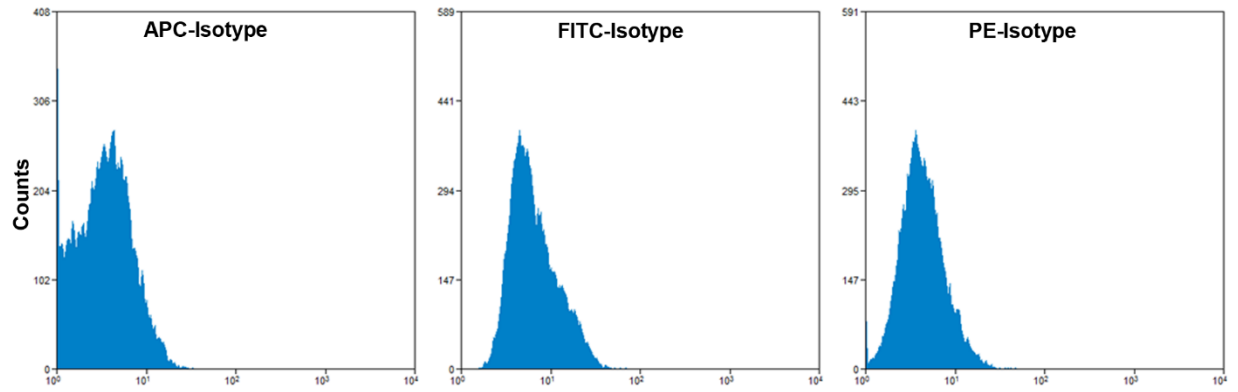

**Supplementary Fig. 1** Isotype histogram images. Isotypes of each antibody (APC-Ly6g, FITC-CD11b, and PE-CD45) were used as controls.

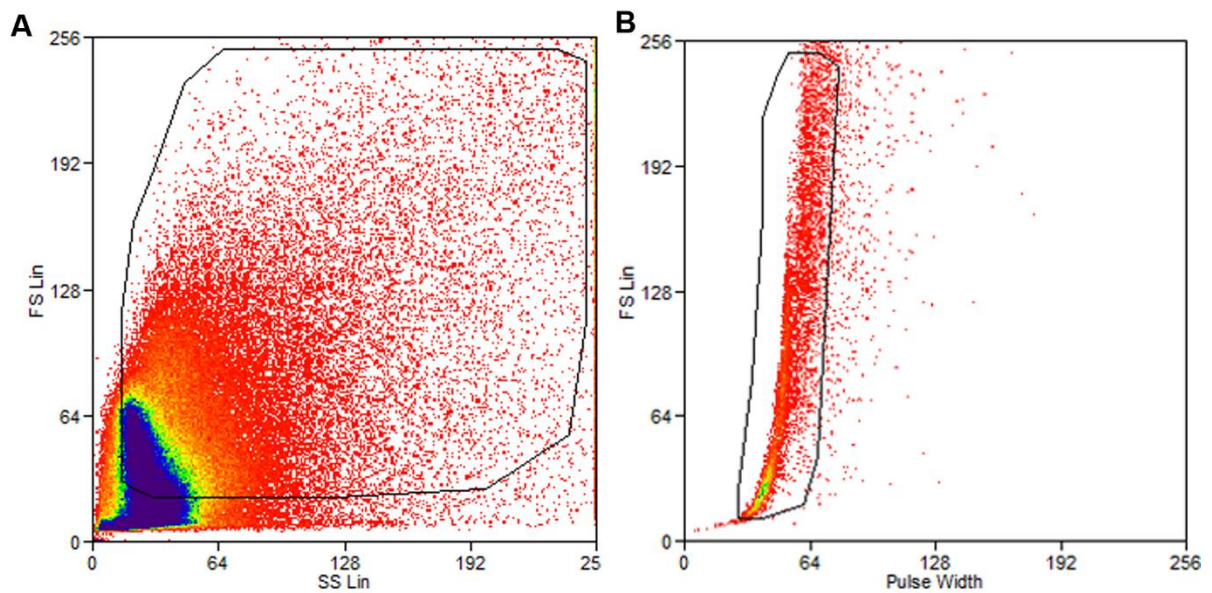

**Supplementary Fig. 2** Flow cytometry by Percoll method. Eight- to ten-week-old male C57BL/6 mice underwent collagenase injection. Mice were sacrificed on day 1 post-ICH. Mouse brain was perfused with phosphate-buffered saline and dissociated into single cells. Cells were stained with APC-Ly6g, FITC-CD11b, PE-CD45, and PI. **(A)** Gating of all cells. **(B)** Gating of singlets.
